# Supplementary material for: The contribution of the rs55705857 G allele to familial cancer risk as estimated in the Utah population database
Source: Springer Nature journal article supplement (doi:10.1186/s12885-019-5381-2), 2019-03-01
Supplement: MOESM1 [file 16520526]

**Additional Table 1:** DNA sample characteristics of glioma patients harboring *IDH1/2* mutant or 1p/19q co-deletion

| Qubit ng/uL | Concentration                    | Source | Replicated | rs55705857 genotype | 147958197 genotype | rs55705857 genotype run 2 |
|-------------|----------------------------------|--------|------------|---------------------|--------------------|---------------------------|
| 94.3        | determined at University of Utah | tumor  | no         | Likely AG           | AG                 | AG                        |
| 112         | determined at Mayo               | blood  | replicate  | AA                  | AA                 | AA                        |
| 112         | determined at Mayo               | blood  | yes        | AA                  | AA                 | AA                        |
| 35.6        | determined at University of Utah | tumor  | no         | AA                  | AA Likely          | AA                        |
| 248         | determined at University of Utah | tumor  | no         | equivocal           | AA Likely          | Failed                    |
| 10.9        | determined at University of Utah | tumor  | no         | equivocal           | Failed             | AA                        |
| 317         | determined at Mayo               | tumor  | no         | AA                  | AA                 | AA                        |
| 150         | determined at Mayo               | blood  | no         | AG                  | AG                 | AG                        |
| 84.7        | determined at Mayo               | tumor  | no         | AG                  | AG                 | AG                        |
| 46.1        | determined at University of Utah | tumor  | yes        | AA                  | Failed             | AA                        |
| 46.1        | determined at University of Utah | tumor  | replicate  | AA                  | Failed             | AA                        |
| 28.2        | determined at University of Utah | tumor  | no         | AG                  | Failed             | het gain of A             |
| 68.8        | determined at University of Utah | tumor  | no         | AA                  | AA Likely          | AA                        |
| 51.6        | determined at University of Utah | tumor  | no         | equivocal           | Failed             | Failed                    |
| 99.7        | determined at Mayo               | blood  | no         | AA                  | AA                 | AA                        |
| 132         | determined at University of Utah | tumor  | no         | equivocal           | Failed             | Likely AA                 |
| 494         | determined at University of Utah | tumor  | no         | AG                  | AA                 | AG                        |
| 192         | determined at University of Utah | tumor  | no         | AA                  | AA Likely          | AA                        |
| 276         | determined at Mayo               | tumor  | no         | GG                  | AG                 | GG                        |
| 108         | determined at Mayo               | blood  | no         | Failed              | AA                 | equivocal                 |
| 560         | determined at University of Utah | tumor  | no         | AA                  | AA Likely          | AA                        |
| 469         | determined at University of Utah | tumor  | no         | GG                  | het gain of G      | Likely GG                 |

**Additional Table 1 Continued:**

| Qubit<br>ng/uL | Concentration                       | Source | Replicated | rs55705857<br>genotype | 147958197<br>genotype | rs55705857<br>genotype<br>run 2 |
|----------------|-------------------------------------|--------|------------|------------------------|-----------------------|---------------------------------|
| 140            | determined at Mayo                  | blood  | no         | AA                     | AA                    | AA                              |
| 43             | determined at<br>University of Utah | tumor  | no         | AA                     | Failed                | AA                              |
| 159            | determined at Mayo                  | blood  | no         | AA                     | AA                    | AA                              |
| 188            | determined at Mayo                  | tumor  | no         | AA                     | AA                    | AA                              |
| 108            | determined at Mayo                  | blood  | no         | AG                     | AG                    | AG                              |
| 366            | determined at<br>University of Utah | tumor  | no         | AG                     | AG Likely             | Likely AG                       |
| 116            | determined at Mayo                  | blood  | no         | equivocal              | AG                    | AG                              |
| 146            | determined at Mayo                  | tumor  | no         | Likely AG              | AG                    | AG                              |
| 126            | determined at Mayo                  | blood  | no         | AA                     | AA                    | AA                              |
| 59.5           | determined at<br>University of Utah | tumor  | no         | equivocal              | Failed                | AA                              |
| too low        | determined at Mayo                  | blood  | no         | AA                     | AA                    | AA                              |
| 151            | determined at Mayo                  | tumor  | no         | AA                     | AA                    | AA                              |
| 116            | determined at Mayo                  | blood  | no         | AA                     | AA                    | AA                              |
| 165            | determined at Mayo                  | tumor  | no         | AA                     | AA                    | AA                              |
| 42.7           | determined at<br>University of Utah | tumor  | no         | AA                     | Failed                | AA                              |
| 110            | determined at Mayo                  | blood  | no         | AA                     | AA                    | AA                              |
| 350            | determined at Mayo                  | tumor  | no         | AA                     | AA                    | AA                              |
| 388            | determined at Mayo                  | tumor  | no         | AG                     | AA                    | AG                              |
| 15.4           | determined at<br>University of Utah | tumor  | no         | AA                     | Failed                | AA                              |
| 24.8           | determined at<br>University of Utah | tumor  | no         | AG                     | AG Likely             | het gain of A                   |
| 102            | determined at<br>University of Utah | tumor  | no         | AA                     | Failed                | AA                              |
| 110            | determined at Mayo                  | blood  | no         | AG                     | AG                    | AG                              |
| 115            | determined at<br>University of Utah | tumor  | no         | AG                     | AG Likely             | AG                              |
| 890            | determined at<br>University of Utah | tumor  | no         | AA                     | AA                    | AA                              |

**Additional Table 1 Continued:**

| Qubit<br>ng/uL | Concentration                       | Source | Replicated | rs55705857<br>genotype | 147958197<br>genotype | rs55705857<br>genotype<br>run 2 |
|----------------|-------------------------------------|--------|------------|------------------------|-----------------------|---------------------------------|
| 87.9           | determined at Mayo                  | blood  | no         | AG                     | AG Likely             | AG                              |
| 89             | determined at Mayo                  | blood  | no         | Likely AA              | AA                    | AA                              |
| 103            | determined at Mayo                  | blood  | no         | AG                     | AA                    | AG                              |
| 37             | determined at<br>University of Utah | tumor  | no         | AG                     | Failed                | AG                              |
| 46             | determined at<br>University of Utah | tumor  | no         | AA                     | AA Likely             | AA                              |
| 37.3           | determined at<br>University of Utah | tumor  | replicate  | AA                     | AA Likely             | AA                              |
| 37.3           | determined at<br>University of Utah | tumor  | yes        | AA                     | AA Likely             | AA                              |
| 108            | determined at Mayo                  | blood  | no         | AG                     | AG                    | AG                              |
| 257            | determined at<br>University of Utah | tumor  | no         | AG                     | het gain of A         | het gain of A                   |
| 105            | determined at Mayo                  | blood  | no         | AG                     | AG                    | AG                              |
| 143            | determined at<br>University of Utah | tumor  | no         | AG                     | AG Likely             | AG                              |
| 106            | determined at<br>University of Utah | tumor  | no         | Failed                 | Failed                | Likely GG                       |
| 17.63          | determined at<br>University of Utah | tumor  | no         | equivocal              | Failed                | AA                              |
| 119            | determined at Mayo                  | blood  | replicate  | AA                     | AA                    | AA                              |
| 119            | determined at Mayo                  | blood  | yes        | AA                     | AA                    | AA                              |
| 230            | determined at Mayo                  | tumor  | no         | AA                     | Failed                | AA                              |
| 42.1           | determined at<br>University of Utah | tumor  | no         | AA                     | AA Likely             | AA                              |
| 77.9           | determined at<br>University of Utah | tumor  | no         | AA                     | AA Likely             | AA                              |

**Additional Table 1 Continued:**

| Qubit<br>ng/uL | Concentration                    | Source | Replicated | rs55705857<br>genotype | 147958197<br>genotype | rs55705857<br>genotype<br>run 2 |
|----------------|----------------------------------|--------|------------|------------------------|-----------------------|---------------------------------|
| 86.8           | determined at Mayo               | blood  | no         | AA                     | AA                    | AA                              |
| 102            | determined at Mayo               | tumor  | no         | AA                     | AA                    | AA                              |
| 214            | determined at University of Utah | tumor  | no         | GG                     | Failed                | Likely GG                       |
| 112            | determined at Mayo               | blood  | no         | AA                     | AA                    | AA                              |
| 29.8           | determined at University of Utah | tumor  | no         | equivocal              | Failed                | Likely AA                       |
| 94.2           | determined at Mayo               | blood  | yes        | AG                     | AG                    | AG                              |
| 94.2           | determined at Mayo               | blood  | replicate  | Likely AG              | AG                    | Likely AG                       |
| 33.5           | determined at University of Utah | tumor  | no         | Likely AG              | Failed                | het gain of A                   |
| 126            | determined at Mayo               | blood  | no         | AG                     | AG                    | AG                              |
| 74.3           | determined at University of Utah | tumor  | no         | Likely AG              | AG Likely             | AG                              |
| 46.8           | determined at University of Utah | tumor  | no         | AG                     | Failed                | Likely AG                       |
| 40.3           | determined at University of Utah | tumor  | no         | AA                     | Failed                | AA                              |
| 141            | determined at Mayo               | blood  | no         | AA                     | AA                    | AA                              |
| 71.6           | determined at University of Utah | tumor  | no         | AA                     | AA Likely             | AA                              |
| 121            | determined at Mayo               | blood  | replicate  | Likely AA              | AA                    | AA                              |
| 121            | determined at Mayo               | blood  | yes        | AA                     | AA                    | AA                              |
| 683            | determined at Mayo               | blood  | yes        | AA                     | AA                    | AA                              |
| 133            | determined at Mayo               | blood  | no         | AA                     | AA                    | AA                              |
| 683            | determined at Mayo               | blood  | replicate  | AA                     | AA                    | AA                              |
| 32.4           | determined at Mayo               | blood  | no         | AG                     | AG                    | AG                              |
| 32.1           | determined at Mayo               | tumor  | no         | Likely AA              | AA                    | AA                              |
| 234            | determined at University of Utah | tumor  | no         | AA                     | Failed                | AA                              |
| 31.4           | determined at University of Utah | tumor  | yes        | AA                     | AA Likely             | Likely AA                       |
| 31.4           | determined at University of Utah | tumor  | replicate  | equivocal              | AA Likely             | AA                              |
| 19.4           | determined at University of Utah | tumor  | replicate  | AG                     | Failed                | het gain of A                   |
| 19.4           | determined at University of Utah | tumor  | yes        | AG                     | Failed                | het gain of A                   |
| 96.4           | determined at University of Utah | tumor  | no         | Failed                 | AA Likely             | Likely AG                       |

**Additional Table 1 Continued:**

| Qubit<br>ng/uL | Concentration                       | Source | Replicated | rs55705857<br>genotype | 147958197<br>genotype | rs55705857<br>genotype<br>run 2 |
|----------------|-------------------------------------|--------|------------|------------------------|-----------------------|---------------------------------|
| 117            | determined at Mayo                  | blood  | no         | AG                     | AG                    | AG                              |
| 47.6           | determined at<br>University of Utah | tumor  | no         | AG                     | Failed                | het gain of A                   |
| 143            | determined at Mayo                  | blood  | no         | Failed                 | Failed                | AA                              |
| 353            | determined at Mayo                  | tumor  | yes        | AA                     | AA                    | AA                              |
| 353            | determined at Mayo                  | tumor  | replicate  | AA                     | AA                    | AA                              |
| 67.8           | determined at<br>University of Utah | tumor  | no         | AG                     | AG Likely             | Likely AG                       |
| 123            | determined at Mayo                  | blood  | no         | equivocal              | AA Likely             | AA                              |
| 112            | determined at Mayo                  | blood  | no         | AA                     | AA                    | AA                              |
| 159            | determined at Mayo                  | blood  | no         | AA                     | Failed                | AA                              |
| 166            | determined at Mayo                  | tumor  | no         | AA                     | AA                    | AA                              |
| too low        | determined at Mayo                  | blood  | no         | AA                     | AA                    | AA                              |
| 223            | determined at Mayo                  | tumor  | no         | AA                     | AA                    | AA                              |
| 75.8           | determined at Mayo                  | blood  | no         | AA                     | AA                    | Likely AA                       |
| 235            | determined at Mayo                  | tumor  | no         | GG                     | het gain of G         | GG                              |
| 110            | determined at Mayo                  | blood  | no         | AA                     | AA                    | AA                              |
| 139            | determined at Mayo                  | blood  | no         | AG                     | AG                    | AG                              |
| 99.6           | determined at Mayo                  | tumor  | no         | Likely AG              | AG                    | AG                              |
| 153            | determined at Mayo                  | blood  | no         | AG                     | AA                    | AG                              |
| 152            | determined at Mayo                  | tumor  | no         | AG                     | AA                    | het gain of G                   |
| 131            | determined at Mayo                  | blood  | no         | equivocal              | AA                    | AA                              |
| 301            | determined at Mayo                  | tumor  | replicate  | AA                     | AA                    | AA                              |
| 301            | determined at Mayo                  | tumor  | yes        | AA                     | AA                    | AA                              |

**Additional Table 1 Continued:**

| Qubit<br>ng/uL | Concentration                       | Source | Replicated | rs55705857<br>genotype | 147958197<br>genotype | rs55705857<br>genotype<br>run 2 |
|----------------|-------------------------------------|--------|------------|------------------------|-----------------------|---------------------------------|
| 240            | determined at Mayo                  | blood  | no         | AA                     | AA                    | Likely AA                       |
| 378            | determined at Mayo                  | tumor  | no         | AA                     | AA                    | AA                              |
| 97.6           | determined at Mayo                  | blood  | no         | AG                     | AG                    | AG                              |
| 122            | determined at Mayo                  | blood  | no         | Likely AG              | AA                    | AA                              |
| 412            | determined at Mayo                  | tumor  | no         | AA                     | AA                    | AA                              |
| 163            | determined at Mayo                  | blood  | no         | AA                     | AA                    | AA                              |
| 118            | determined at Mayo                  | tumor  | no         | Failed                 | AA                    | AA                              |
| 217            | determined at<br>University of Utah | tumor  | no         | AA                     | AA Likely             | Likely AA                       |
| 53             | determined at Mayo                  | blood  | no         | AA                     | AA                    | AA                              |
| 279            | determined at Mayo                  | tumor  | no         | AA                     | AA                    | AA                              |
| 103            | determined at Mayo                  | tumor  | no         | AG                     | AA                    | AG                              |
| 221            | determined at<br>University of Utah | tumor  | no         | equivocal              | AG                    | Likely AG                       |
| 166            | determined at Mayo                  | blood  | no         | AA                     | AA                    | AA                              |
| 295            | determined at<br>University of Utah | tumor  | no         | AA                     | Failed                | AA                              |
| 43.3           | determined at<br>University of Utah | tumor  | replicate  | GG                     | het gain of A         | GG                              |
| 43.3           | determined at<br>University of Utah | tumor  | yes        | Failed                 | het gain of A         | Likely GG                       |
| 153            | determined at Mayo                  | tumor  | no         | AG                     | AA                    | Likely AG                       |
| 60.5           | determined at Mayo                  | blood  | no         | AG                     | Failed                | AG                              |
| 190            | determined at Mayo                  | tumor  | no         | AA                     | AA                    | AA                              |
| 38.2           | determined at Mayo                  | blood  | replicate  | Failed                 | AG                    | AG                              |
| 38.2           | determined at Mayo                  | blood  | yes        | AG                     | AG                    | AG                              |
| 277            | determined at Mayo                  | tumor  | no         | AG                     | AG                    | AG                              |

**Supplementary Table 2 Continued:**

| Qubit<br>ng/uL | Concentration      | Source | Replicated | rs55705857<br>genotype | 147958197<br>genotype | rs55705857<br>genotype<br>run 2 |
|----------------|--------------------|--------|------------|------------------------|-----------------------|---------------------------------|
| 12.2           | determined at Mayo | blood  | no         | AA                     | AA                    | AA                              |
| 73.3           | determined at Mayo | tumor  | no         | AA                     | AA Likely             | AA                              |
| 108            | determined at Mayo | blood  | no         | Likely AA              | AA                    | AA                              |
| 157            | determined at Mayo | blood  | no         | AA                     | AA                    | AA                              |
| 217            | determined at Mayo | tumor  | no         | AA                     | AA                    | AA                              |
| 186            | determined at Mayo | tumor  | no         | AA                     | AA                    | AA                              |
| 111            | determined at Mayo | blood  | no         | AA                     | AA                    | AA                              |
| 130            | determined at Mayo | blood  | no         | AG                     | AA                    | equivocal                       |
| 18.7           | determined at Mayo | blood  | no         | GG                     | AG                    | GG                              |
| 119            | determined at Mayo | blood  | no         | AG                     | AG                    | AG                              |
| 118            | determined at Mayo | blood  | no         | AA                     | AA                    | AA                              |
| 166            | determined at Mayo | tumor  | no         | AA                     | AA                    | Failed                          |
| 233            | determined at Mayo | blood  | no         | AA                     | AA                    | AA                              |
| 92.9           | determined at Mayo | tumor  | yes        | Likely AA              | AA                    | AA                              |
| 92.9           | determined at Mayo | tumor  | replicate  | AA                     | AA                    | AA                              |
| 118            | determined at Mayo | blood  | no         | AG                     | AG                    | AG                              |
| 115            | determined at Mayo | blood  | no         | AG                     | AG                    | AG                              |
| 134            | determined at Mayo | blood  | replicate  | AG                     | AG                    | Likely AG                       |
| 134            | determined at Mayo | blood  | yes        | AG                     | AG                    | AG                              |
| 107            | determined at Mayo | blood  | no         | AA                     | AA                    | AA                              |
| 124            | determined at Mayo | tumor  | no         | AA                     | AA                    | AA                              |
| water          | water              | water  | water      | Failed                 | Failed                | Failed                          |
| water          | water              | water  | water      | Failed                 | Failed                | Failed                          |
| water          | water              | water  | water      | Failed                 | Failed                | Failed                          |
| water          | water              | water  | water      | Failed                 | Failed                | Failed                          |

Shown are the genotype results of 102 unique individuals. Samples were submitted in 96-well plates. Fifteen water blanks and replicate samples were plated at random. Cells highlighted in blue were called G Allele positive for rs55705857. Cells highlighted in orange have discrepancy between G allele status at rs55705857 in blood and tumor samples. Blood is germline and thus was held to be the true representation of an individual's G allele status at rs55705857.
